# Supplementary material for: A vaccine targeting mutant IDH1 in newly diagnosed glioma
Source: PubMed Central journal article supplement (PMC8046668; doi:10.1038/s41586-021-03363-z), 2021-03-24
Supplement: 41586_2021_3363_MOESM1_ESM.pdf [file 41586_2021_3363_MOESM1_ESM.pdf]

## Supplementary information

---

# A vaccine targeting mutant IDH1 in newly diagnosed glioma

---

In the format provided by the  
authors and unedited

Platten et al. A vaccine targeting mutant IDH1 in newly diagnosed glioma

Supplementary Information to:

A vaccine targeting mutant IDH1 in newly diagnosed glioma

Supplementary Tables

Supplementary Table 1. NOA16 trial sites.

| <b>Trial sites<br/>(all in Germany)</b> | <b>Number of pts<br/>with completed<br/>screening</b> | <b>Number of pts<br/>enrolled</b> | <b>Number of pts<br/>treated (SDS)</b> | <b>Number of pts<br/>evaluable (IDS)</b> |
|-----------------------------------------|-------------------------------------------------------|-----------------------------------|----------------------------------------|------------------------------------------|
| Heidelberg                              | 20                                                    | 14                                | 14                                     | 14                                       |
| Freiburg                                | 3                                                     | 2                                 | 2                                      | 2                                        |
| Berlin                                  | 5                                                     | 4                                 | 4                                      | 4                                        |
| Essen                                   | 6                                                     | 3                                 | 2                                      | 0                                        |
| Dresden                                 | 3                                                     | 3                                 | 3                                      | 3                                        |
| Frankfurt                               | 3                                                     | 3                                 | 3                                      | 3                                        |
| Tübingen                                | 4                                                     | 4                                 | 4                                      | 4                                        |
| All centers                             | 44                                                    | 33                                | 32                                     | 30                                       |

NOA16 was a multi-center trial at seven sites across Germany. In total, 44 patients were screened and 30 patients were evaluable for immunogenicity. Pts, patients; SDS, safety data set; IDS, immunogenicity data set.

Supplementary Table 2. Reasons for screening failure.

| Screening ID | Reason due to molecular screening                                        | Reason regarding Inclusion-/Exclusion criteria                                                                                                             |
|--------------|--------------------------------------------------------------------------|------------------------------------------------------------------------------------------------------------------------------------------------------------|
| 01-001       |                                                                          | Incl. criteria violated: Evidence of two informed consent documents personally signed and dated by the patient                                             |
|              |                                                                          | Incl. criteria violated: Patient is willing and able to comply with scheduled visits, treatment plan, laboratory tests, and other study procedures.        |
| 01-002       | IDH1R132H absent                                                         |                                                                                                                                                            |
| 01-006       |                                                                          | Incl. criteria violated: Woman of child-bearing potential                                                                                                  |
|              |                                                                          | Excl. criteria met: Pregnancy or lactation                                                                                                                 |
| 01-007       | no Absence of chromosomal 1p/19q co-deletion, no loss of ATRX expression |                                                                                                                                                            |
| 01-008       | no Loss of ATRX expression                                               |                                                                                                                                                            |
| 01-014       | no Absence of chromosomal 1p/19q co-deletion, no loss of ATRX expression |                                                                                                                                                            |
| 02-002       | IDH1R132H absent, no loss of ATRX expression                             |                                                                                                                                                            |
| 03-003       |                                                                          | Excl. criteria met: Abnormal (= Grade 2 CTCAE v4.0) laboratory values for hematology, liver and renal function (serum creatinine).                         |
| 04-004       |                                                                          | Excl. criteria met: Progressive (incl. PsPD) or recurrent disease after radiation therapy, chemotherapy or radiochemotherapy based on local MRI assessment |
| 04-005       |                                                                          | Incl. criteria violated: Evidence of two informed consent documents personally signed and dated by the patient                                             |
| 04-006       |                                                                          | Excl. criteria met: Progressive (incl. PsPD) or recurrent disease after radiation therapy, chemotherapy or radiochemotherapy based on local MRI assessment |

Screening failed due to either molecular parameters or violated inclusion / met exclusion criteria. First two digits of screening ID refer to trial center number. N = 11 screening failures.

Supplementary Table 3. Baseline characteristics and PsPD in NOA16 and control cohort of astrocytoma

| pt ID                 | sex | Age (years) | WHO grade | localization | extent of resection<br>ST:<br>subtotal<br>C:<br>complete | SOC pre IDH1-vac<br>Concomitant (c)TMZ: 75 mg/m <sup>2</sup> BSA daily during RT<br>Monotherapy (mono-) TMZ: 3 cycles<br>RT: 30 x 2 Gy, if not other specified | SOC during IDH1-vac<br>Adjuvant (a)TMZ: 150-200 mg/m <sup>2</sup> BSA 5/28 days, 6 cycles if not other specified | methylation class<br>low grade (L)<br>high grade (H)<br>n.d.: not determined |
|-----------------------|-----|-------------|-----------|--------------|----------------------------------------------------------|----------------------------------------------------------------------------------------------------------------------------------------------------------------|------------------------------------------------------------------------------------------------------------------|------------------------------------------------------------------------------|
| ID01                  | f   | 31          | 3         | overlapping  | ST                                                       | cTMZ + RT                                                                                                                                                      | aTMZ                                                                                                             | L                                                                            |
| ID02                  | m   | 40          | 4         | frontal      | C                                                        | cTMZ + RT                                                                                                                                                      | aTMZ                                                                                                             | L                                                                            |
| ID03                  | m   | 44          | 3         | frontal      | C                                                        | cTMZ + RT                                                                                                                                                      | aTMZ                                                                                                             | L                                                                            |
| ID04                  | f   | 40          | 3         | frontal      | biopsy                                                   | RT                                                                                                                                                             | no aTMZ                                                                                                          | n.d.                                                                         |
| ID05                  | m   | 47          | 3         | temporal     | ST                                                       | cTMZ + RT                                                                                                                                                      | aTMZ                                                                                                             | H                                                                            |
| ID06                  | f   | 46          | 4         | frontal      | ST                                                       | cTMZ + RT                                                                                                                                                      | aTMZ                                                                                                             | H                                                                            |
| ID07                  | m   | 37          | 4         | frontal      | C                                                        | cTMZ + RT                                                                                                                                                      | aTMZ                                                                                                             | H                                                                            |
| ID08                  | f   | 33          | 4         | frontal      | ST                                                       | cTMZ + RT                                                                                                                                                      | aTMZ                                                                                                             | n.d.                                                                         |
| ID09                  | f   | 43          | 4         | frontal      | ST                                                       | cTMZ + RT                                                                                                                                                      | aTMZ                                                                                                             | H                                                                            |
| ID10                  | f   | 54          | 3         | frontal      | biopsy                                                   | mono-TMZ                                                                                                                                                       | aTMZ                                                                                                             | n.d.                                                                         |
| ID11                  | m   | 39          | 3         | frontal      | ST                                                       | mono-TMZ                                                                                                                                                       | aTMZ (12 cycles)                                                                                                 | n.d.                                                                         |
| ID12                  | f   | 29          | 4         | frontal      | ST                                                       | cTMZ + RT                                                                                                                                                      | aTMZ                                                                                                             | H                                                                            |
| ID13                  | m   | 35          | 3         | frontal      | C                                                        | RT (59.4 Gy)                                                                                                                                                   | aTMZ                                                                                                             | L                                                                            |
| ID14                  | f   | 46          | 4         | frontal      | C                                                        | cTMZ + RT                                                                                                                                                      | aTMZ                                                                                                             | H                                                                            |
| ID15                  | f   | 26          | 3         | other        | ST                                                       | cTMZ + RT                                                                                                                                                      | no aTMZ                                                                                                          | n.d.                                                                         |
| ID17                  | f   | 46          | 3         | frontal      | C                                                        | mono-TMZ                                                                                                                                                       | aTMZ (12 cycles)                                                                                                 | n.d.                                                                         |
| ID18                  | m   | 49          | 3         | other        | C                                                        | cTMZ + RT                                                                                                                                                      | aTMZ                                                                                                             | n.d.                                                                         |
| ID19                  | m   | 43          | 3         | frontal      | C                                                        | RT (59.4 Gy)                                                                                                                                                   | aTMZ (10 cycles)                                                                                                 | L                                                                            |
| ID20                  | m   | 25          | 3         | frontal      | C                                                        | RT                                                                                                                                                             | aTMZ                                                                                                             | L                                                                            |
| ID21                  | m   | 35          | 3         | temporal     | ST                                                       | cTMZ + RT                                                                                                                                                      | aTMZ (8 cycles)                                                                                                  | n.d.                                                                         |
| ID22                  | f   | 35          | 4         | frontal      | C                                                        | cTMZ + RT                                                                                                                                                      | aTMZ                                                                                                             | H                                                                            |
| ID23                  | m   | 53          | 3         | frontal      | biopsy                                                   | cTMZ + RT (50.0 Gy)                                                                                                                                            | aTMZ                                                                                                             | H                                                                            |
| ID24                  | m   | 46          | 3         | frontal      | C                                                        | cTMZ + RT                                                                                                                                                      | aTMZ                                                                                                             | L                                                                            |
| ID25                  | m   | 41          | 3         | frontal      | ST                                                       | RT                                                                                                                                                             | no aTMZ                                                                                                          | L                                                                            |
| ID26                  | m   | 34          | 4         | frontal      | ST                                                       | cTMZ + RT                                                                                                                                                      | aTMZ                                                                                                             | L                                                                            |
| ID27                  | m   | 42          | 3         | frontal      | C                                                        | cTMZ + RT (59.4 Gy)                                                                                                                                            | aTMZ                                                                                                             | L                                                                            |
| ID28                  | m   | 40          | 3         | temporal     | C                                                        | cTMZ + RT (54.0 Gy)                                                                                                                                            | aTMZ                                                                                                             | H                                                                            |
| ID29                  | m   | 24          | 4         | temporal     | C                                                        | cTMZ + RT                                                                                                                                                      | aTMZ                                                                                                             | L                                                                            |
| ID30                  | m   | 28          | 3         | frontal      | C                                                        | cTMZ + RT                                                                                                                                                      | aTMZ (3 cycles)                                                                                                  | H                                                                            |
| ID31                  | m   | 56          | 3         | frontal      | C                                                        | cTMZ + RT                                                                                                                                                      | aTMZ                                                                                                             | L                                                                            |
| ID32                  | m   | 53          | 4         | other        | ST                                                       | cTMZ + RT                                                                                                                                                      | aTMZ                                                                                                             | L                                                                            |
| ID33                  | f   | 54          | 3         | frontal      | C                                                        | RT (59.4 Gy)                                                                                                                                                   | aTMZ                                                                                                             | L                                                                            |
| <b>control cohort</b> |     |             |           |              |                                                          |                                                                                                                                                                |                                                                                                                  |                                                                              |
| pt ID                 | sex | age (years) | WHO grade | localization | extent of resection                                      | Treatment                                                                                                                                                      | Methylation class                                                                                                | PsPD                                                                         |
| HD01                  | m   | 26          | 3         | temporal     | biopsy                                                   | RT                                                                                                                                                             | L                                                                                                                | no                                                                           |
| HD02                  | m   | 27          | 3         | frontal      | C                                                        | mono-TMZ                                                                                                                                                       | L                                                                                                                | no                                                                           |

Platten et al. A vaccine targeting mutant IDH1 in newly diagnosed glioma

|      |   |    |   |             |        |                  |      |     |
|------|---|----|---|-------------|--------|------------------|------|-----|
| HD03 | f | 34 | 3 | frontal     | C      | mono-TMZ         | L    | no  |
| HD04 | f | 31 | 3 | frontal     | ST     | RT               | L    | no  |
| HD05 | m | 23 | 3 | temporal    | biopsy | mono-TMZ         | L    | no  |
| HD06 | m | 27 | 4 | frontal     | C      | RT               | n.d. | no  |
| HD07 | f | 34 | 4 | frontal     | C      | RT               | L    | yes |
| HD08 | f | 53 | 4 | frontal     | C      | cTMZ + RT        | L    | yes |
| HD09 | m | 64 | 4 | frontal     | SC     | cTMZ + RT        | L    | no  |
| HD10 | f | 27 | 3 | frontal     | C      | mono-TMZ         | L    | no  |
| HD11 | f | 40 | 3 | frontal     | ST     | cTMZ + RT + aTMZ | L    | yes |
| HD12 | f | 24 | 4 | frontal     | C      | cTMZ + RT + aTMZ | L    | no  |
| HD13 | m | 33 | 3 | frontal     | ST     | cTMZ + RT + aTMZ | n.d. | no  |
| HD14 | m | 31 | 4 | frontal     | C      | cTMZ + RT + aTMZ | n.d. | no  |
| HD15 | f | 45 | 3 | other       | C      | cTMZ + RT + aTMZ | L    | no  |
| HD16 | m | 41 | 3 | frontal     | C      | cTMZ + RT + aTMZ | n.d. | no  |
| HD17 | m | 32 | 3 | other       | C      | cTMZ + RT + aTMZ | L    | yes |
| HD18 | f | 27 | 3 | frontal     | ST     | cTMZ + RT + aTMZ | L    | no  |
| HD19 | f | 30 | 3 | frontal     | biopsy | cTMZ + RT + aTMZ | L    | no  |
| HD20 | m | 32 |   |             | ST     | cTMZ + RT + aTMZ | L    | no  |
| HD21 | m | 36 | 3 | temporal    | biopsy | cTMZ + RT + aTMZ | L    | no  |
| HD22 | m | 41 | 4 | frontal     | ST     | cTMZ + RT + aTMZ | L    | no  |
| HD23 | m | 21 | 3 | frontal     | C      | cTMZ + RT + aTMZ | L    | no  |
| HD24 | f | 20 | 3 | frontal     | C      | cTMZ + RT + aTMZ | L    | yes |
| HD25 | m | 56 | 3 | frontal     | ST     | cTMZ + RT + aTMZ | L    | no  |
| HD26 | m | 40 | 4 | frontal     | ST     | cTMZ + RT + aTMZ | L    | no  |
| HD27 | f | 32 | 3 | frontal     | C      | cTMZ + RT + aTMZ | L    | no  |
| HD28 | m | 34 | 3 | temporal    | C      | cTMZ + RT + aTMZ | n.d. | no  |
| HD29 | f | 27 | 4 | temporal    | C      | cTMZ + RT + aTMZ | L    | no  |
| HD30 | m | 52 | 3 | frontal     | C      | cTMZ + RT        | L    | no  |
| HD31 | m | 33 | 3 | frontal     | C      | mono-TMZ         | L    | no  |
| HD32 | m | 31 | 4 | other       | ST     | cTMZ + RT + aTMZ | L    | yes |
| HD33 | m | 35 | 3 | frontal     | C      | cTMZ + RT + aTMZ | L    | yes |
| HD34 | m | 56 | 3 | temporal    | C      | cTMZ + RT + aTMZ | L    | no  |
| HD35 | f | 22 | 3 | temporal    | C      | cTMZ + RT + aTMZ | L    | no  |
| HD36 | m | 44 | 3 | frontal     | C      | cTMZ + RT + aTMZ | n.d. | no  |
| HD37 | m | 41 | 3 | overlapping | C      | cTMZ + RT + aTMZ | L    | no  |
| HD38 | m | 47 | 3 | frontal     | ST     | cTMZ + RT + aTMZ | L    | no  |
| HD39 | m | 43 | 3 | frontal     | ST     | cTMZ + RT + aTMZ | L    | yes |
| HD40 | f | 44 | 4 | frontal     | C      | cTMZ + RT + aTMZ | H    | no  |
| HD41 | m | 56 | 4 | temporal    | C      | cTMZ + RT + aTMZ | H    | no  |
| HD42 | f | 51 | 4 | overlapping | C      | cTMZ + RT + aTMZ | H    | no  |
| HD43 | m | 52 | 4 | frontal     | ST     | cTMZ + RT + aTMZ | H    | no  |
| HD44 | m | 48 | 4 | frontal     | C      | cTMZ + RT + aTMZ | H    | no  |
| HD45 | f | 36 | 4 | frontal     | C      | cTMZ + RT + aTMZ | H    | yes |
| HD46 | f | 34 | 4 | frontal     | C      | cTMZ + RT + aTMZ | H    | no  |
| HD47 | m | 61 | 4 | temporal    | ST     | mono-TMZ         | H    | no  |
| HD48 | f | 63 | 4 | frontal     | C      | cTMZ + RT + aTMZ | H    | no  |
| HD49 | m | 51 | 4 | frontal     | C      | cTMZ + RT + aTMZ | H    | no  |
| HD50 | m | 43 | 4 | temporal    | ST     | RT               | H    | no  |
| HD51 | m | 27 | 4 | temporal    | C      | cTMZ + RT + aTMZ | H    | no  |
| HD52 | m | 29 | 4 | frontal     | C      | RT               | H    | no  |
| HD53 | f | 33 | 4 | temporal    | ST     | cTMZ + RT + aTMZ | n.d. | no  |
| HD54 | f | 45 | 4 | overlapping | ST     | cTMZ + RT + aTMZ | H    | no  |
| HD55 | f | 37 | 4 | overlapping | C      | cTMZ + RT + aTMZ | H    | yes |
| HD56 | f | 29 | 4 | frontal     | C      | cTMZ + RT + aTMZ | H    | no  |
| HD57 | m | 33 | 4 | frontal     | C      | cTMZ + RT + aTMZ | n.d. | no  |
| HD58 | m | 48 | 4 | frontal     | C      | cTMZ + RT + aTMZ | H    | no  |

## Platten et al. A vaccine targeting mutant IDH1 in newly diagnosed glioma

|      |   |    |   |         |    |                  |   |    |
|------|---|----|---|---------|----|------------------|---|----|
| HD59 | f | 45 | 4 | frontal | ST | cTMZ + RT + aTMZ | H | no |
| HD60 | f | 50 | 4 | frontal | C  | cTMZ + RT + aTMZ | H | no |

All patients of the control cohort treated in Heidelberg, median observation time, 7.3 years. Pt, patient; m, male; f, female; ST, subtotal resection; C, complete resection; RT, radiotherapy, 30 x 2 Gy, if not specified differently; TMZ, temozolomide; (c)TMZ, concomitant TMZ, 75mg/m<sup>2</sup> body surface area (BSA) daily during RT; (a)TMZ, adjuvant TMZ, 150-200 mg/m<sup>2</sup> BSA 5/28 days, 6 cycles if not specified differently; mono-TMZ, monotherapy with TMZ, 3 cycles; L, methylation class low grade; H, methylation class high grade; n.d., not determined. N(control cohort) = 60 patients; N(NOAI6 cohort) = 32 patients.

Supplementary Table 4. Treatment emergent AEs of the SDS.

| <b>Safety Data Set (N=32)</b><br><br><b>Patient-days of total IDH1-vac exposure: 4834 days</b> | <b>AEs</b><br><br><b>All causalities n (%)</b> | <b>AEs</b><br><br><b>Treatment-related n (%)</b> |
|------------------------------------------------------------------------------------------------|------------------------------------------------|--------------------------------------------------|
| Patients with AE                                                                               | 32 (100)                                       | 29 (90.6)                                        |
| Patients with SAEs                                                                             | 2 (6.3)                                        | 1 (3.1)                                          |
| Patients with severe AEs (CTCAE grade 3/4)                                                     | 5 (15.6)                                       | -                                                |
| Patients discontinued due to AE                                                                | 1 (3.1)                                        | -                                                |
| Patients with dose reduction or temporary discontinuation due to AE                            | 3 (9.4)                                        | 1 (3.1)                                          |
| <b>AEs (all causalities) by Preferred Term in &gt; 5 % of patients (MedDRA 20.1)</b>           | <b>Frequencies n (%), 95%-CI)</b>              |                                                  |
| Injection site induration                                                                      | 21 (65.6, 95%-CI: 46.81-81.43)                 |                                                  |
| Injection site erythema                                                                        | 15 (46.9, 95%-CI: 29.09-65.26)                 |                                                  |
| Erythema                                                                                       | 5 (15.6, 95%-CI: 5.28-32.79)                   |                                                  |
| Influenza like illness                                                                         | 3 (9.4, 95%-CI: 1.98-25.02)                    |                                                  |
| Injection site pruritus                                                                        | 3 (9.4, 95%-CI: 1.98-25.02)                    |                                                  |
| Injection site reaction                                                                        | 2 (6.3, 95%-CI: 0.77-20.81)                    |                                                  |

AE, adverse event; SAE, serious AE; CTCAE, NCI Common Terminology Criteria for Adverse Events.



Supplementary Table 5. All adverse events according to System Organ Class.

| System Organ Class                                                  | No. of pts (%) with AE all causalities | No. of pts (%) with AE related to IDH1-vac |
|---------------------------------------------------------------------|----------------------------------------|--------------------------------------------|
| General disorders and administration site conditions                | 29 (90.6)                              | 27 (84.4)                                  |
| Gastrointestinal disorders                                          | 16 (50.0)                              | -                                          |
| Infections and infestations                                         | 11 (34.4)                              | 1 (3.1)                                    |
| Nervous system disorders                                            | 10 (31.3)                              | 1 (3.1)                                    |
| Investigations                                                      | 8 (25.0)                               | 1 (3.1)                                    |
| Skin and subcutaneous tissue disorders                              | 8 (25.0)                               | 8 (25.0)                                   |
| Musculoskeletal and connective tissue disorders                     | 7 (21.9)                               | 1 (1.3)                                    |
| Blood and lymphatic system disorders                                | 3 (9.4)                                | -                                          |
| Eye disorders                                                       | 2 (6.3)                                | -                                          |
| Psychiatric disorders                                               | 2 (6.3)                                | 1 (3.1)                                    |
| Respiratory, thoracic and mediastinal disorders                     | 2 (6.3)                                | -                                          |
| Ear and labyrinth disorders                                         | 1 (3.1)                                | -                                          |
| Endocrine disorders                                                 | 1 (3.1)                                | -                                          |
| Immune system disorders                                             | 1 (3.1)                                | 1 (3.1)                                    |
| Injury, poisoning and procedural complications                      | 1 (3.1)                                | -                                          |
| Metabolism and nutrition disorders                                  | 1 (3.1)                                | -                                          |
| Neoplasms benign, malignant and unspecified (incl cycts and polyps) | 1 (3.1)                                | -                                          |
| Vascular disorders                                                  | 1 (3.1)                                | -                                          |

System Organ Class according to MedDRA 20.1. Adverse events in the safety data set (SDS) are shown and classified as treatment-related or with all causalities. AE, adverse event; pts, patients; IDH1-vac, IDH1R132H vaccine. N = 32 patients in the SDS.

Supplementary Table 6. HLA types of the Safety Data Set

|         | 14      | 13      | 12      | 11      | 10      | 9       | 8       | 7       | 6       | 5       | 4       | 3       | 2       | 1       | ID         |
|---------|---------|---------|---------|---------|---------|---------|---------|---------|---------|---------|---------|---------|---------|---------|------------|
| 02:05:0 | 30:01:0 | 02:01:0 | 30:02:0 | 01:01:0 | 23:01:0 | 02:01:0 | 02:01:0 | 02:01:0 | 03:01:0 | 29:02:0 | 01:01:0 | 24:02:0 | 02:01:0 | 24:02:0 | HLA-A 1    |
| 23:01:0 | 02:01:0 | 02:01:0 | 24:02:0 | 03:01:0 | 01:01:0 | 32:01:0 | 32:01:0 | 11:01:0 | 03:01:0 | 25:01:0 | 02:01:0 | 25:01:0 | 26:01:0 | 03:01:0 | HLA-A 2    |
| 49:01:0 | 57:01:0 | 51:01:0 | 18:01:0 | 07:02:0 | 57:01:0 | 51:01:0 | 51:01:0 | 40:01:0 | 07:02:0 | 18:01:0 | 40:01:0 | 18:01:0 | 38:01:0 | 35:02:0 | HLA-B 1    |
| 50:01:0 | 13:02:0 | 15:01:0 | 35:03:0 | 08:01:0 | 41:02:0 | 44:02:0 | 44:02:0 | 35:01:0 | 44:02:0 | 44:03:0 | 50:01:0 | 18:01:0 | 15:01:0 | 47:01:0 | HLA-B 2    |
| 06:02:0 | 06:02:0 | 14:02:0 | 05:01:0 | 07:01:0 | 17:01:0 | 05:01:0 | 07:02:0 | 04:01:0 | 07:02:0 | 16:AUE  | 05:01:0 | 07:01:0 | 12:03:0 | 04:01:0 | HLA-C 1    |
| 07:01:0 | 06:02:0 | 04:01:0 | 04:01:0 | 07:02:0 | 06:02:0 | 15:02:0 | 07:04:0 | 03:04:0 | 07:04:0 | 12:AUE  | 03:04:0 | 12:03:0 | 03:03:0 | 06:02:0 | HLA-C 2    |
| 04:05:0 | 07:01:0 | 08:01:0 | 03:01:0 | 04:07:0 | 11:04:0 | 04:02:0 | 14:54:0 | 15:01:0 | 14:54:0 | 04:01:0 | 13:02:0 | 01:03   | 14:01:0 | 11:04:0 | HLA-DRB 1  |
| 07:01:0 | 07:01:0 | 08:01:0 | 13:02:0 | 03:01:0 | 07:01:0 | 13:01:0 | 16:01:0 | 01:01:0 | 16:01:0 | 07:01:0 | 07:01:0 | 01:01:0 | 01:03:0 | 13:01:0 | HLA-DRB 2  |
| 03:02:0 | 03:03:0 | 04:02:0 | 06:04:0 | 02:01:0 | 03:03:0 | 06:03:0 | 05:02:0 | 06:02:0 | 05:02:0 | 03:211  | 06:04:0 | 05:01:0 | 05:AW   | 06:03:0 | HLA-DQB 1  |
| 02:02:0 | 02:02:0 | 04:02:0 | 02:01:0 | 03:01:0 | 03:01:0 | 03:02:0 | 05:03:0 | 05:01:0 | 05:03:0 | 02:02:0 | 02:02:0 | 05:01:0 | 03:01:0 | 03:01:0 | HLA-DQB 2  |
| 03:FYK  | 03:FYK  | 05:RGP  | 04:HJM  | 03:FYK  | 13:AKX  | 04:01:0 | 04:01:0 | 04:FNV  | 04:01:0 | 01:AET  | 03:FYK  | 04:01:0 | 04:FNV  | 02:01   | HLA-DPB 1  |
| 04:ADC  | 02:AHZ  | 03:FNV  | 04:FNV  | 04:ADC  | 13:AKX  | 04:01:0 | 02:01   | 04:HJM  | 02:01   | 04:01:0 | 04:ADC  | 02:01   | 04:HJM  | 04:01:0 | HLA-DPB 2  |
| NNNN    | NNNN    | NNNN    | 02:ERV  | 01:BZF  | 02:ERV  | 02:ERV  | 02:03   | NNNN    | 02:03   | NNNN    | 03:GM   | NNNN    | 02:24   | 01:BZF  | DRB3 1     |
| NNNN    | NNNN    | NNNN    | 03:GM   | NNNN    | NNNN    | NNNN    | NNNN    | NNNN    | NNNN    | NNNN    | NNNN    | NNNN    | NNNN    | 02:ERV  | DRB3 2     |
| 01:03:0 | 01:03:0 | NNNN    | NNNN    | 01:03:0 | 01:03:0 | 01:03:0 | NNNN    | NNNN    | NNNN    | 01:01:0 | 01:03:0 | NNNN    | NNNN    | NNNN    | DRB4 1     |
| 01:03:0 | 01:03:0 | NNNN    | NNNN    | NNNN    | NNNN    | NNNN    | NNNN    | NNNN    | NNNN    | 01:03:0 | NNNN    | NNNN    | NNNN    | NNNN    | DRB4 2     |
| NNNN    | NNNN    | NNNN    | NNNN    | NNNN    | NNNN    | NNNN    | 02:XA   | 01:HJH  | NNNN    | NNNN    | NNNN    | NNNN    | NNNN    | NNNN    | DRB5 1     |
| NNNN    | NNNN    | NNNN    | NNNN    | NNNN    | NNNN    | NNNN    | NNNN    | NNNN    | NNNN    | NNNN    | NNNN    | NNNN    | NNNN    | NNNN    | DRB5 2     |
| 02:01:0 | 02:01:0 | 04:01:0 | 01:CAV  | 03:CEY  | 02:01:0 | 01:03:0 | 01:02   | 01:CAV  | 01:02   | 02:01:0 | 01:CAV  | 01:01:0 | 01:CAV  | 01:03:0 | HLA-DQA1 1 |
| 03:01:0 | 02:01:0 | 04:02   | 05:01   | 05:01   | 05:BZC  | 03:01:0 | 01:CAV  | 01:CAV  | 01:CAV  | 03:01:0 | 02:01:0 | 01:01:0 | 05:BZC  | 05:BZC  | HLA-DQA1 2 |
| 01:CES  | 01:CES  | 01:CES  | 01:CES  | 01:CES  | 02:CJA  | 01:CES  | 01:CES  | 01:CES  | 01:CES  | 01:CES  | 01:CES  | 01:03:0 | 01:CES  | 01:CES  | HLA-DPA1 1 |
| 01:CES  | 01:CES  | 02:RYH  | 01:CES  | 01:CES  | 02:CJA  | 01:CES  | 01:CES  | 01:CES  | 01:CES  | 02:RYH  | 01:CES  | 01:03:0 | 01:CES  | 01:CES  | HLA-DPA1 2 |



Platten et al. A vaccine targeting mutant IDH1 in newly diagnosed glioma

|           |         |         |
|-----------|---------|---------|
| <b>32</b> | 01:01:0 | 01:01:0 |
|           | 02:01:0 | 26:01:0 |
|           | 15:01:0 | 49:01:0 |
|           | 07:02:0 | 55:01:0 |
|           | 03:03:0 | 03:03:0 |
|           | 07:02:0 | 12:03:0 |
|           | 04:01:0 | 11:01:0 |
|           | 07:01:0 | 07:01:0 |
|           | 03:02:0 | 02:02:0 |
|           | 02:02:0 | 03:01:0 |
|           | 10:01:0 | 11:01:0 |
|           | 04:02:0 | 04:01:0 |
|           | NNNN    | 02:ERV  |
|           | NNNN    | NNNN    |
|           | 01:01:0 | 01:01:0 |
|           | 01:03:0 | NNNN    |
|           | NNNN    | NNNN    |
|           | NNNN    | NNNN    |
|           | 02:01:0 | 02:01:0 |
|           | 03:01:0 | 05:BZC  |
|           | 01:CES  | 01:CES  |
|           | 02:CJA  | 02:CJA  |

HLA types of 16 alleles and 6 paralogues are shown. NNNN, not detected. For decoding multiple allele codes (MAC) please visit : <https://hml.nmdp.org/MacUI/>. N = 32 patients in the SDS.

Supplementary Table 7. Mutation-specificity scores in the Immunogenicity Data Set

| ID   | MSS    | ID   | MSS    |
|------|--------|------|--------|
| ID01 | 87.78  | ID17 | 43.78  |
| ID02 | 9.00   | ID18 | 25.78  |
| ID03 | 110.11 | ID20 | 82.78  |
| ID04 | 64.89  | ID22 | 113.67 |
| ID05 | 10.44  | ID23 | 89.44  |
| ID06 | 231.44 | ID24 | 41.11  |
| ID07 | 33.00  | ID25 | 113.22 |
| ID08 | 36.56  | ID26 | 39.88  |
| ID09 | 42.56  | ID27 | 130.33 |
| ID10 | 45.33  | ID28 | 95.89  |
| ID11 | 115.76 | ID29 | 21.00  |
| ID12 | 146.56 | ID30 | 12.00  |
| ID13 | 24.11  | ID31 | 77.11  |
| ID14 | 21.00  | ID32 | 62.44  |
| ID15 | 55.33  | ID33 | 108.89 |

Mutation-specificity scores were calculated from longitudinal ELISpot data of T cell responses to mutated and wildtype IDH1 peptide as depicted in ED Figure 7. MSS, mutation-specificity score. N = 30 patients in the IDS.

Supplementary Table 8. Exploratory analyses performed within the Safety Data Set.

| ID | PLA <sup>primary</sup> | PLA <sup>relapse</sup> | TCRB <sup>PSPD</sup> | (scRNA-TCR-seq) <sup>PSPD</sup> | longitudinal TCRB <sup>PBMC</sup> | (RNA-panel + 850k methylation) <sup>primary</sup> | (RNA-panel + 850k methylation) <sup>relapse</sup> | HLA typing | Flow cytometry <sup>PBMC</sup> |
|----|------------------------|------------------------|----------------------|---------------------------------|-----------------------------------|---------------------------------------------------|---------------------------------------------------|------------|--------------------------------|
| 01 | x                      |                        |                      |                                 |                                   | x                                                 |                                                   | x          | x                              |
| 02 |                        |                        |                      |                                 |                                   | x                                                 |                                                   | x          | x                              |
| 03 |                        |                        |                      |                                 | x                                 | x                                                 |                                                   | x          | x                              |
| 04 |                        |                        |                      |                                 | x                                 |                                                   |                                                   | x          | x                              |
| 05 | x                      |                        |                      |                                 | x                                 | x                                                 |                                                   | x          | x                              |
| 06 |                        |                        |                      |                                 | x                                 | x                                                 |                                                   | x          | x                              |
| 07 | x                      |                        |                      |                                 |                                   | x                                                 |                                                   | x          | x                              |
| 08 |                        |                        | x                    | x                               | x                                 |                                                   |                                                   | x          | x                              |
| 09 |                        | x                      |                      |                                 | x                                 | x                                                 |                                                   | x          | x                              |
| 10 | x                      |                        |                      |                                 | x                                 |                                                   |                                                   | x          | x                              |
| 11 |                        |                        |                      |                                 | x                                 |                                                   |                                                   | x          | x                              |
| 12 | x                      |                        |                      |                                 | x                                 | x                                                 |                                                   | x          | x                              |
| 13 |                        |                        |                      |                                 | x                                 | x                                                 |                                                   | x          | x                              |
| 14 | x                      |                        |                      |                                 |                                   | x                                                 |                                                   | x          | x                              |
| 15 |                        |                        |                      |                                 | x                                 |                                                   |                                                   | x          | x                              |
| 17 |                        |                        |                      |                                 | x                                 |                                                   |                                                   | x          | x                              |
| 18 |                        |                        |                      |                                 |                                   |                                                   |                                                   | x          | x                              |
| 19 |                        |                        |                      |                                 |                                   | x                                                 |                                                   | x          |                                |
| 20 | x                      |                        |                      |                                 | x                                 | x                                                 |                                                   | x          | x                              |
| 21 |                        |                        |                      |                                 | x                                 |                                                   |                                                   | x          |                                |
| 22 | x                      |                        |                      |                                 | x                                 | x                                                 |                                                   | x          | x                              |
| 23 |                        |                        |                      |                                 | x                                 | x                                                 |                                                   | x          | x                              |
| 24 |                        |                        |                      |                                 | x                                 | x                                                 |                                                   | x          | x                              |
| 25 | x                      | x                      |                      |                                 | x                                 | x                                                 | x                                                 | x          | x                              |
| 26 | x                      |                        |                      |                                 | x                                 | x                                                 |                                                   | x          | x                              |
| 27 |                        |                        |                      |                                 | x                                 | x                                                 |                                                   | x          | x                              |
| 28 | x                      |                        |                      |                                 | x                                 | x                                                 |                                                   | x          | x                              |
| 29 |                        |                        |                      |                                 |                                   | x                                                 |                                                   | x          | x                              |
| 30 |                        |                        |                      |                                 | x                                 | x                                                 |                                                   | x          | x                              |
| 31 | x                      |                        |                      |                                 | x                                 | x                                                 |                                                   | x          | x                              |
| 32 | x                      |                        |                      |                                 | x                                 | x                                                 |                                                   | x          | x                              |
| 33 |                        |                        |                      |                                 | x                                 | x                                                 |                                                   | x          | x                              |
|    | N=13                   | N=2                    | N=1                  | N=1                             | N=25                              | N=24                                              | N=1                                               | N=32       | N=30                           |

Cellular and molecular analyses were performed on tumor tissues, peripheral blood and peripheral blood-derived cells at indicated time points during the study. PLA, proximity ligation assay on FFPE tissues; TCRB, TCR beta deep sequencing on cryopreserved tissues or PBMC; ScRNA-TCR-seq, single cell TCR- and single cell RNA-sequencing on slow-frozen T cells; RNA panel, targeted RNA panel sequencing on FFPE tissue; HLA typing, human leukocyte antigen next-generation sequencing; primary, primary tissue; relapse, post-treatment relapse tissue; PSPD, pseudoprogression. N = 32 patients in the SDS.

Supplementary Table 9. Molecular analyses of the Safety Data Set

| ID   | CDKN2A/B deletions | tsne cluster methylation | CNV-L   |
|------|--------------------|--------------------------|---------|
| ID01 | 0                  | L                        | L       |
| ID02 | 0                  | L                        | L       |
| ID03 | het                | L                        | L       |
| ID04 | n.d.               | n.d.                     | n.d.    |
| ID05 | het*               | H                        | H       |
| ID06 | het*               | H                        | H       |
| ID07 | het                | H                        | H       |
| ID08 | n.d.               | n.d.                     | n.d.    |
| ID09 | homo               | H                        | H       |
| ID10 | n.d.               | n.d.                     | n.d.    |
| ID11 | n.d.               | n.d.                     | n.d.    |
| ID12 | homo               | H                        | H       |
| ID13 | 0                  | L                        | L       |
| ID14 | 0                  | H                        | H       |
| ID15 | n.d.               | n.d.                     | n.d.    |
| ID17 | n.d.               | n.d.                     | n.d.    |
| ID18 | n.d.               | n.d.                     | n.d.    |
| ID19 | het*               | L                        | L       |
| ID20 | 0                  | L                        | L       |
| ID21 | n.d.               | n.d.                     | n.d.    |
| ID22 | homo               | H                        | H       |
| ID23 | het                | H                        | L       |
| ID24 | 0                  | L                        | L       |
| ID25 | 0 (P) het (R)      | L (P+R)                  | L (P+R) |
| ID26 | 0                  | L                        | L       |
| ID27 | 0                  | L                        | L       |
| ID28 | 0                  | H                        | L       |
| ID29 | 0                  | L                        | L       |
| ID30 | homo               | H                        | H       |
| ID31 | 0                  | L                        | L       |
| ID32 | 0                  | L                        | L       |
| ID33 | 0                  | L                        | L       |

CDKN2A/B status, methylation, and copy number variations are listed. CDKN, cyclin-dependent kinase inhibitor; 0, no CDKN2A/B deletion; homo, homozygous CDKN2A/B deletions; het, heterozygous CDKN2A/B deletion; \*, heterozygous CDKN2A/B deletion ambiguous; H (tsne), methylation class high grade astrocytomas; L (tsne), methylation class low grade astrocytomas 31; CNV-L, copy number variation load; H (CNV-L), high CNV-L (>350 Mb); L (CNV-L), low CNV-L (< 350 Mb); P, primary tissue; R, relapse tissue; n.d. not determined. N = 32 patients in the SDS.
